# Supplementary material
Source: publisher figshare collection journal article supplement (https://tandf.figshare.com/articles/dataset/_/22709799)
Supplement: Supplementary file 1 [file 1]

| **Table S4. Screening target proteins interacted with bioactives of CBFD from SEA and ATP** | | |
| --- | --- | --- |
| SEA: 363 targets | STP: 502 targets | SEA,STP overlapping targets: 140 targets |
| AKR1B1 | AKR1B1 | AKR1B1 |
| PAOX | GBA | FUCA1 |
| FUCA2 | CA1 | SLC29A1 |
| FUCA1 | TGM2 | ADORA3 |
| SLC29A1 | CA9 | ADORA1 |
| ADORA3 | VDR | DNMT3B |
| DNPH1 | EGFR | CDA |
| ADORA1 | MIF | ADORA2A |
| SLC28A2 | NOS2 | AHCY |
| DNMT3B | HTR6 | GAPDH |
| CDA | TYR | ADK |
| ADORA2A | DAO | HSPA8 |
| AMD1 | KDM4E | TK1 |
| P2RY2 | KDM4A | ADORA2B |
| P2RY6 | KDM4D | ADA |
| AHCY | KDM4C | IMPDH2 |
| SRM | HCAR2 | TYMP |
| DTYMK | P4HTM | EHMT1 |
| GAPDH | DDO | ADH1A |
| ADK | HSP90AA1 | PDCD4 |
| QARS | TLR4 | POLA1 |
| HSPA8 | FUCA1 | PNP |
| TOP1 | ADA | EHMT2 |
| SMS | CDA | POLB |
| DOT1L | ADK | HSPA5 |
| P2RY14 | DPP4 | SLC5A2 |
| RARS | ADORA1 | CA9 |
| KMT5C | ADORA2A | CA12 |
| SETDB1 | ADORA3 | CA14 |
| P2RX1 | HSPA8 | CA1 |
| TARS | GAPDH | OGA |
| TK1 | AHCY | OGT |
| PRMT7 | HSPA5 | GRK1 |
| ADORA2B | TK1 | CA2 |
| IMPDH1 | MAPK1 | AKR1B10 |
| FUT6 | MCL1 | SLC22A6 |
| RNASE1 | PYGM | PPARA |
| RNASE2 | PDCD4 | PLA2G4B |
| HARS | CA2 | OXER1 |
| RNASEL | TYMS | CES2 |
| GPR17 | OGA | LPAR6 |
| HLCS | CA12 | PAM |
| P2RY11 | GAA | FAAH |
| ADA | GSK3B | PHF8 |
| IARS | PNP | GSTK1 |
| PARG | PIM1 | EPHX1 |
| EZH1 | EHMT1 | FABP3 |
| SUV39H1 | EHMT2 | ACP1 |
| DNMT1 | CA14 | HAO1 |
| RAC1 | GRK1 | HMGCR |
| IMPDH2 | CCND1 | KDM2A |
| MARS | F2 | NOD1 |
| P2RX4 | IDO1 | KDM4A |
| TYMP | CDK4 | RARB |
| ATIC | CA7 | CDC25B |
| PRMT1 | CA13 | KDM4C |
| PLCG1 | HDAC1 | PTGER2 |
| UMPS | SLC5A1 | EPHX2 |
| KMT2A | TYMP | TBXAS1 |
| CDC42 | HK2 | S1PR3 |
| TK2 | HK1 | CDC25A |
| EHMT1 | DNMT3B | S1PR4 |
| TPMT | CDK9 | NAAA |
| CD69 | CSNK2A1 | PRKCA |
| P2RY1 | CCNT1 | PLA2G2A |
| SETD7 | CHRNA7 | HSD17B3 |
| HPRT1 | FDFT1 | S1PR5 |
| ADH1A | NPC1L1 | PPARG |
| PDCD4 | PTGER2 | TBXA2R |
| NPEPPS | PTGFR | FOLH1 |
| POLA1 | FNTA | PTGER4 |
| PAX8 | NR1H4 | PLA2G4A |
| PNP | G6PD | FFAR4 |
| INMT | GPBAR1 | GABBR1 |
| LGALS7 | HSD11B1 | FABP4 |
| LGALS7B | ACLY | PTGFR |
| EHMT2 | AR | LAP3 |
| MAP3K7 | CYP19A1 | KDM4E |
| HSPA1A | POLB | PPARD |
| LGALS9 | CDC25A | S1PR1 |
| POLB | AKR1B10 | TRPV1 |
| TRPA1 | FABP4 | CNR1 |
| NCOA3 | PPARA | KDM5C |
| P2RY4 | FABP3 | SQLE |
| HSPA5 | FABP5 | MGLL |
| ST6GAL1 | PPARD | CNR2 |
| HEXA | FFAR1 | SPHK2 |
| HEXB | FABP2 | NPC1L1 |
| POLG | HSD11B2 | CDC45 |
| SLC5A2 | HAO1 | GPBAR1 |
| CA9 | UGT2B7 | SRD5A1 |
| CA12 | SERPINA6 | SRD5A2 |
| CA14 | SHBG | RORA |
| CA1 | HSD17B3 | NR1H4 |
| FGF1 | GABBR1 | NR1H3 |
| OGA | SLC22A6 | SREBF2 |
| FGF2 | GABRA2 | TRIM24 |
| ERAP1 | FNTB | TLR4 |
| OGT | GABRB2 | PRKCE |
| GRK1 | GABRG2 | LPAR5 |
| CA2 | ESR2 | CYP17A1 |
| LGALS3 | PAM | SHBG |
| LGALS1 | ALPL | SERPINA6 |
| MGMT | AKR1A1 | G6PD |
| B4GALT1 | LTA4H | VDR |
| AHCYL1 | PTGS1 | AR |
| IL6 | PTGS2 | ESR2 |
| AKR1B10 | ACE | ESR1 |
| TLR2 | KDM5C | EBP |
| SLC22A6 | PARP14 | CYP19A1 |
| SLC22A8 | PARP1 | CHEK2 |
| PPARA | PARP10 | CBFB |
| GPR84 | CPA1 | HPSE |
| PLA2G4B | TDP2 | SCD |
| BBOX1 | MME | PLG |
| OXER1 | ECE1 | TNKS |
| LPAR4 | ERCC5 | DHODH |
| GNAI1 | FEN1 | PARP2 |
| GNAI3 | PARP2 | CCND1 |
| CYP4F2 | SRD5A1 | PARP1 |
| GABRQ | SRD5A2 | PHLPP1 |
| KDM7A | GRM5 | AKT1 |
| CES2 | HTR7 | ILK |
| LPAR3 | DRD4 | BCHE |
| SLC25A20 | MPO | MAOB |
| LPAR6 | HSD17B7 | AKR1C1 |
| DNM1 | DPP7 | MAOA |
| COL4A3BP | DRD3 | MIF |
| P2RY10 | CHRM2 | SHH |
| CES1 | CHRM1 | UGT2B7 |
| GNAO1 | ADH1A | NR1H2 |
| ACER2 | SLC6A4 | RORC |
| PAM | DPP8 | ABCB1 |
| MPEG1 | DPP9 | TAAR1 |
| ADH7 | SLC6A3 | HSD11B2 |
| KDM5A | GABRB3 | PTPN1 |
| GPR34 | GABRA5 | PTPN2 |
| PLA2G2C | GABRA3 | TAS2R31 |
| POLM | GABRA1 | NPY5R |
| FAAH | GABRA6 | PRF1 |
| PLA2G5 | PHF8 |  |
| FDPS | KDM2A |  |
| GGPS1 | GSTK1 |  |
| LPAR2 | PTPN1 |  |
| PHF8 | NR0B2 |  |
| GSTK1 | CDC45 |  |
| EPHX1 | PTPRC |  |
| LPAR1 | PPARG |  |
| GPR174 | RXRA |  |
| FABP3 | CYP26A1 |  |
| BHMT | CYP26B1 |  |
| SLCO2A1 | RARG |  |
| S1PR2 | RARB |  |
| SELL | RARA |  |
| CDC25C | FAAH |  |
| SLC6A11 | TERT |  |
| SMPD2 | FABP1 |  |
| ADH1B | FFAR4 |  |
| LTB4R | CACNA2D1 | |
| ACP1 | RXRG |  |
| SELP | ALOX15 |  |
| ENPP2 | ALOX12 |  |
| HAO1 | PTGER4 |  |
| HMGCR | RXRB |  |
| GSTM1 | SLC16A1 |  |
| KDM2A | GLRA1 |  |
| NOD1 | ABCC1 |  |
| PLA2G4C | ABCB1 |  |
| KDM4A | EPHX2 |  |
| RARB | HMGCR |  |
| CDC25B | PTGES |  |
| KDM4C | PLG |  |
| PTGER2 | TBXA2R |  |
| EPHX2 | PLA2G4A |  |
| THRB | SCD |  |
| GSR | HTR2B |  |
| POLH | RORB |  |
| THRA | RORA |  |
| TBXAS1 | SAE1 |  |
| S1PR3 | HNF4A |  |
| ENPEP | UBA2 |  |
| CDC25A | CDC25B |  |
| POLL | PRKCG |  |
| POLK | PRKCD |  |
| SPHK1 | PRKCE |  |
| S1PR4 | PRKCH |  |
| ADH1C | PRKCQ |  |
| NAAA | CNR2 |  |
| PLA2G10 | DHCR7 |  |
| PRKCA | PRKCA |  |
| PLA2G2A | PRKCB |  |
| HSD17B3 | RORC |  |
| S1PR5 | GCGR |  |
| PPARG | TRPV1 |  |
| TBXA2R | PSEN2 |  |
| FOLH1 | CNR1 |  |
| DAGLA | PIM3 |  |
| PTGER4 | CYP11B2 |  |
| PTGIR | CXCR3 |  |
| PLA2G4A | TSPO |  |
| FFAR4 | GRIN1 |  |
| SLC22A1 | GNRHR |  |
| GSTA1 | AVPR1A |  |
| GABBR2 | BRD4 |  |
| GABBR1 | KDR |  |
| PTGER3 | ALOX5AP |  |
| FABP4 | MDM2 |  |
| PTGFR | NPY5R |  |
| LAP3 | PKM |  |
| GPR35 | CRHR1 |  |
| ATG4B | QPCT |  |
| KDM4E | ICMT |  |
| GABRR1 | ROCK2 |  |
| PPARD | ROCK1 |  |
| S1PR1 | MTNR1A |  |
| TRPV1 | MTNR1B |  |
| CNR1 | PTAFR |  |
| KDM5C | GCK |  |
| CPT2 | NOD1 |  |
| CA3 | NOD2 |  |
| SQLE | S1PR3 |  |
| KAT5 | S1PR1 |  |
| PAFAH1B2 | MAPK14 |  |
| MGLL | KIF11 |  |
| CNR2 | CHRNA4 |  |
| SOAT2 | OPRD1 |  |
| SPHK2 | OPRK1 |  |
| NPC1L1 | TRIM24 |  |
| CDC45 | MCHR1 |  |
| CD4 | FKBP1A |  |
| GPBAR1 | ADRA2A |  |
| ABCC4 | ADRA2C |  |
| SRD5A1 | IGF1R |  |
| SRD5A2 | EPHX1 |  |
| ST3GAL1 | HRH3 |  |
| RORA | SRC |  |
| SLC10A1 | HRH4 |  |
| NR1H4 | STAT3 |  |
| ABCB11 | ALK |  |
| NR1H3 | PSENEN |  |
| SREBF2 | NCSTN |  |
| TRIM24 | APH1A |  |
| VEGFA | PSEN1 |  |
| TLR4 | APH1B |  |
| PRKCE | CHRNB2 |  |
| PLCG2 | GRIN2B |  |
| ABCC2 | CYP51A1 |  |
| LPAR5 | FOLH1 |  |
| APEX1 | OXER1 |  |
| CYP17A1 | KCNH2 |  |
| SHBG | GRM1 |  |
| SERPINA6 | SLC22A2 |  |
| G6PD | SLC47A1 |  |
| VDR | SLC47A2 |  |
| AR | ALOX5 |  |
| ESR2 | OPRM1 |  |
| SLC10A2 | TUBB1 |  |
| ESR1 | HDAC6 |  |
| EBP | SLC6A15 |  |
| GBA2 | HPGD |  |
| CYP19A1 | OPRL1 |  |
| UGCG | PTGDR |  |
| EPHA7 | BDKRB2 |  |
| EPHA2 | PTGES2 |  |
| EPHA5 | HTR1A |  |
| EPHA4 | CYP17A1 |  |
| EPHA8 | PLK4 |  |
| EPHB3 | SIRT2 |  |
| SLC22A3 | ACP1 |  |
| PDK2 | TRPV4 |  |
| MCHR2 | ITGAL |  |
| CHEK2 | LPAR6 |  |
| CBFB | LPAR5 |  |
| GUSB | IL2 |  |
| HPSE | AKT1 |  |
| PLAUR | PPM1B |  |
| PI4KA | PPP1CC |  |
| NR2E3 | PPP5C |  |
| CCND3 | PPP1CA |  |
| SCD | S1PR5 |  |
| PIP5K1C | S1PR4 |  |
| PLAU | FASN |  |
| PI4KB | ACACB |  |
| WNT3A | GPR119 |  |
| MPL | IKBKE |  |
| TNKS2 | TBK1 |  |
| PLG | ICAM1 |  |
| TNKS | ITGB2 |  |
| DHODH | CES2 |  |
| PARP2 | PTPN2 |  |
| STK38 | RBP4 |  |
| STAT1 | GRIN2A |  |
| PLAT | GRIA2 |  |
| GFER | HCRTR2 |  |
| CCND1 | HCRTR1 |  |
| PARP1 | PFKFB3 |  |
| NEK9 | MET |  |
| TLK2 | CDK5R1 |  |
| MAST1 | DYRK1A |  |
| STK39 | APP |  |
| FGFR1 | TGFBR1 |  |
| NEK5 | CTSL |  |
| NEK7 | CCR1 |  |
| SRPK2 | NTRK1 |  |
| STK11 | SMO |  |
| F7 | CTSS |  |
| NIM1K | NR1H3 |  |
| PRPF4B | ADRA1D |  |
| FADS1 | ADRA1A |  |
| HUNK | ADRA1B |  |
| LATS1 | MAPK11 |  |
| SBK1 | MKNK2 |  |
| PHLPP1 | BRPF1 |  |
| TTPA | AURKA |  |
| AKT1 | P2RX7 |  |
| ILK | EZH2 |  |
| SGK3 | JAK2 |  |
| BCHE | IDH1 |  |
| NQO1 | SYK |  |
| USP4 | MTOR |  |
| USP5 | PLK1 |  |
| PCSK7 | CFD |  |
| BCAT1 | MAPK8 |  |
| ELAVL1 | PIK3CD |  |
| MAOB | PIK3CG |  |
| AKR1C1 | MAPK9 |  |
| NMUR2 | CDK1 |  |
| CALM1 | CDK2 |  |
| MAOA | PIK3CA |  |
| TOP2A | PDE10A |  |
| MIF | AGPAT2 |  |
| TDP1 | PIK3CB |  |
| CCR6 | ITK |  |
| SHH | CCNA2 |  |
| UGT2B7 | GPR4 |  |
| NR1H2 | CTSB |  |
| GC | RAF1 |  |
| CYP24A1 | GHSR |  |
| CYP27B1 | CCNB3 |  |
| EPHB1 | PGGT1B |  |
| EPHA1 | MAP2K1 |  |
| EPHA6 | LRRK2 |  |
| RORC | PDPK1 |  |
| EPHB2 | VCP |  |
| ABCB1 | CSF1R |  |
| AGBL2 | ABL1 |  |
| GSTM2 | AMPD3 |  |
| GSTP1 | PRF1 |  |
| TAAR1 | CCNB1 |  |
| PHLPP2 | CCNB2 |  |
| TAS1R1 | CDK5 |  |
| CD81 | NQO2 |  |
| IL1B | PLA2G4B |  |
| HSD11B2 | MGLL |  |
| PTPN1 | HSD17B1 |  |
| PTPN2 | NR1I3 |  |
| TAS2R31 | CYP2C9 |  |
| PIN1 | NR3C1 |  |
| NR0B1 | HRH1 |  |
| ADCY1 | MAOA |  |
| NPY5R | MAOB |  |
| PRF1 | CTSK |  |
| SMAD3 | CCR2 |  |
|  | SCN2A |  |
|  | SCN10A |  |
|  | GPR139 |  |
|  | ELANE |  |
|  | HSD3B1 |  |
|  | PGR |  |
|  | KCNA5 |  |
|  | GPR88 |  |
|  | CTSH |  |
|  | CACNA1B |  |
|  | NAMPT |  |
|  | C5AR1 |  |
|  | SPHK2 |  |
|  | OGT |  |
|  | CHRM3 |  |
|  | ABCG2 |  |
|  | DRD2 |  |
|  | HTR2A |  |
|  | HTR2C |  |
|  | PDE9A |  |
|  | CENPE |  |
|  | HSD17B2 |  |
|  | LSS |  |
|  | SELE |  |
|  | POLA1 |  |
|  | NR1H2 |  |
|  | TTL |  |
|  | AKR1C1 |  |
|  | PRSS1 |  |
|  | CTRC |  |
|  | ACHE |  |
|  | SSTR4 |  |
|  | BCL2 |  |
|  | TNF |  |
|  | EBP |  |
|  | ANPEP |  |
|  | BACE2 |  |
|  | XPNPEP1 |  |
|  | LAP3 |  |
|  | PEPD |  |
|  | XPNPEP2 |  |
|  | IMPDH2 |  |
|  | CASP3 |  |
|  | IRAK4 |  |
|  | SLC6A2 |  |
|  | AURKB |  |
|  | RPS6KB1 |  |
|  | MMP13 |  |
|  | MMP9 |  |
|  | MMP1 |  |
|  | AKT2 |  |
|  | CHEK2 |  |
|  | CBFB |  |
|  | METAP2 |  |
|  | DHODH |  |
|  | RPS6KA3 |  |
|  | HPSE |  |
|  | ILK |  |
|  | ESR1 |  |
|  | CCKAR |  |
|  | JAK3 |  |
|  | JAK1 |  |
|  | GPR55 |  |
|  | STS |  |
|  | GPR18 |  |
|  | LDLR |  |
|  | PLA2G7 |  |
|  | PDK1 |  |
|  | CDC7 |  |
|  | GLI1 |  |
|  | CALCRL |  |
|  | PHLPP1 |  |
|  | CTSD |  |
|  | SREBF2 |  |
|  | CYP2C19 |  |
|  | BCHE |  |
|  | PTGER1 |  |
|  | SQLE |  |
|  | PTPN6 |  |
|  | TBXAS1 |  |
|  | SIGMAR1 |  |
|  | SHH |  |
|  | PREP |  |
|  | GSK3A |  |
|  | CCNE1 |  |
|  | MMP3 |  |
|  | DAPK3 |  |
|  | TAAR1 |  |
|  | CLK4 |  |
|  | TYK2 |  |
|  | CLK1 |  |
|  | CLK3 |  |
|  | DYRK2 |  |
|  | DCTPP1 |  |
|  | SIRT1 |  |
|  | EPHB4 |  |
|  | C1R |  |
|  | RPS6KA5 |  |
|  | PIP4K2C |  |
|  | GRK2 |  |
|  | MERTK |  |
|  | BCAT2 |  |
|  | TLR9 |  |
|  | PHOSPHO1 | |
|  | MKNK1 |  |
|  | TNKS |  |
|  | CA6 |  |
|  | TTR |  |
|  | CA5B |  |
|  | CA5A |  |
|  | SLC29A1 |  |
|  | TNNI3K |  |
|  | ACVRL1 |  |
|  | ADORA2B |  |
|  | SLC5A2 |  |
|  | DHFR |  |
|  | NAAA |  |
|  | BACE1 |  |
|  | CYP11B1 |  |
|  | FLT3 |  |
|  | PDE4A |  |
|  | PDE4B |  |
|  | PDE4D |  |
|  | PDE4C |  |
|  | CCNA1 |  |
|  | TRPM8 |  |
|  | CA4 |  |
|  | NR3C2 |  |
|  | AKR1C2 |  |
|  | TAS2R31 |  |
|  | HIF1A |  |
|  | EPAS1 |  |
|  | PLA2G2A |  |
|  | ATP12A |  |
|  | AKR1C3 |  |
|  | MAPK10 |  |
|  | PDGFRA |  |
|  | PSMB5 |  |
|  | PDGFRB |  |

| **Table S5. Screening target proteins connected to BPH from DiGeNet and GeneCards OMIM databases** | |
| --- | --- |
| The number of 3,016 gout-related targets | The number of 67 final overlapping targets |
| A1CF | ADORA3 |
| A2M | DNMT3B |
| AAA1 | CDA |
| AAAS | ADORA2A |
| AADACL2-AS1 | GAPDH |
| AAVS1 | ADK |
| ABCA1 | HSPA8 |
| ABCA4 | ADA |
| ABCB1 | TYMP |
| ABCC11 | EHMT1 |
| ABCC2 | PNP |
| ABCC3 | EHMT2 |
| ABCC4 | HSPA5 |
| ABCC5 | SLC5A2 |
| ABCC6 | CA1 |
| ABCC8 | GRK1 |
| ABCC9 | CA2 |
| ABCF1 | SLC22A6 |
| ABCG1 | PPARA |
| ABCG2 | PAM |
| ABHD6 | GSTK1 |
| ABO | ACP1 |
| ACACA | HMGCR |
| ACAD8 | NOD1 |
| ACADM | RARB |
| ACADS | PTGER2 |
| ACAN | S1PR3 |
| ACE | PRKCA |
| ACKR3 | PLA2G2A |
| ACOT7 | PPARG |
| ACOXL | PTGER4 |
| ACP1 | PLA2G4A |
| ACP5 | GABBR1 |
| ACR | PPARD |
| ACSBG1 | S1PR1 |
| ACTA2 | TRPV1 |
| ACTB | CNR1 |
| ACTBL2 | CNR2 |
| ACTG1 | SPHK2 |
| ACTG2 | GPBAR1 |
| ACTN1 | RORA |
| ACVR2A | TLR4 |
| ADA | CYP17A1 |
| ADA2 | SHBG |
| ADAD1 | VDR |
| ADAM10 | AR |
| ADAM11 | ESR2 |
| ADAM15 | ESR1 |
| ADAM17 | EBP |
| ADAM8 | CYP19A1 |
| ADAMTS12 | CHEK2 |
| ADAMTS3 | HPSE |
| ADAMTS4 | SCD |
| ADAMTS5 | PLG |
| ADAMTS7 | DHODH |
| ADAMTS9 | PARP2 |
| ADAR | CCND1 |
| ADARB1 | PARP1 |
| ADCAD2 | AKT1 |
| ADCYAP1R1 | BCHE |
| ADGRE2 | MIF |
| ADGRE5 | SHH |
| ADGRG1 | RORC |
| ADI1 | ABCB1 |
| ADIPOQ | HSD11B2 |
| ADIPOR1 | PTPN2 |
| ADIPOR2 | PRF1 |
| ADK |  |
| ADM |  |
| ADORA2A | |
| ADORA3 |  |
| ADPGK-AS1 | |
| ADRA1A |  |
| ADRA2B |  |
| ADRB2 |  |
| ADRB3 |  |
| ADRM1 |  |
| ADSL |  |
| AFF1 |  |
| AFF3 |  |
| AFP |  |
| AGBL2 |  |
| AGBL3 |  |
| AGER |  |
| AGPAT1 |  |
| AGT |  |
| AGTR1 |  |
| AGTR2 |  |
| AGXT2 |  |
| AHI1 |  |
| AHNAK |  |
| AHR |  |
| AHSA1 |  |
| AHSG |  |
| AICDA |  |
| AIF1 |  |
| AIFM2 |  |
| AIM2 |  |
| AIMP1 |  |
| AIMP2 |  |
| AIRE |  |
| AKAP12 |  |
| AKIRIN2 |  |
| AKR1D1 |  |
| AKT1 |  |
| AKT2 |  |
| ALB |  |
| ALCAM |  |
| ALDH16A1 | |
| ALDH1A1 |  |
| ALDH1A2 |  |
| ALDH1A3 |  |
| ALDH2 |  |
| ALG1L3P |  |
| ALOX12 |  |
| ALOX15 |  |
| ALOX5 |  |
| ALOX5AP |  |
| ALPK1 |  |
| ALPL |  |
| ALPP |  |
| ALX4 |  |
| AMACR |  |
| AMD1 |  |
| AMD1P2 |  |
| AMH |  |
| AMOT |  |
| AMPD1 |  |
| AMPD2 |  |
| ANG |  |
| ANGPT1 |  |
| ANGPT2 |  |
| ANGPTL4 |  |
| ANK1 |  |
| ANKH |  |
| ANKRD55 |  |
| ANO8 |  |
| ANP32B |  |
| ANPEP |  |
| ANXA1 |  |
| ANXA2 |  |
| ANXA3 |  |
| ANXA4 |  |
| ANXA5 |  |
| ANXA6 |  |
| AOC1 |  |
| AP2S1 |  |
| AP4B1-AS1 | |
| AP5B1 |  |
| APAF1 |  |
| APC |  |
| APCS |  |
| APLN |  |
| APOA1 |  |
| APOA2 |  |
| APOB |  |
| APOBEC3C | |
| APOE |  |
| APOL6 |  |
| APOM |  |
| APP |  |
| APRT |  |
| APRTD |  |
| AQP1 |  |
| AQP9 |  |
| AR |  |
| ARC |  |
| AREG |  |
| ARG1 |  |
| ARG2 |  |
| ARHGAP24 | |
| ARHGEF2 |  |
| ARHGEF25 | |
| ARHGEF5 |  |
| ARHGEF7 |  |
| ARID5B |  |
| ARL15 |  |
| ARMD1 |  |
| ARMH1 |  |
| ARNTL |  |
| ARNTL2 |  |
| ARPC1A |  |
| ARRB1 |  |
| ARRB2 |  |
| ARTS |  |
| ASAH1 |  |
| ASB15 |  |
| ASB15-AS1 | |
| ASCC1 |  |
| ASF1A |  |
| ASIC1 |  |
| ASIC3 |  |
| ASIP |  |
| ASPA |  |
| ASPM |  |
| ASPN |  |
| ASPSCR1 |  |
| ASRGL1 |  |
| ATAT1 |  |
| ATF2 |  |
| ATF3 |  |
| ATF6B |  |
| ATF7IP |  |
| ATG16L1 |  |
| ATG5 |  |
| ATHS |  |
| ATIC |  |
| ATM |  |
| ATN1 |  |
| ATOH1 |  |
| ATP1A1 |  |
| ATP1A4 |  |
| ATP6V1G1 | |
| ATP6V1G2 | |
| ATP6V1G2-DDX39B | |
| ATP6V1H |  |
| ATP7A |  |
| ATP7B |  |
| ATR |  |
| ATRIP |  |
| ATRNL1 |  |
| ATXN2 |  |
| AURKA |  |
| AZGP1 |  |
| B3GAT1 |  |
| B3GNT2 |  |
| B3GNT9 |  |
| B3GNTL1 |  |
| B4GALT1 |  |
| B4GALT1-AS1 | |
| B4GALT7 |  |
| BABAM2 |  |
| BACE2 |  |
| BACH2 |  |
| BAG6 |  |
| BAIAP2 |  |
| BAIAP2L1 |  |
| BAK1 |  |
| BANK1 |  |
| BANP |  |
| BARTS3 |  |
| BATF |  |
| BAX |  |
| BAZ1B |  |
| BBC3 |  |
| BCAS3 |  |
| BCHE |  |
| BCKDHA |  |
| BCL2 |  |
| BCL2A1 |  |
| BCL2L1 |  |
| BCL2L11 |  |
| BCL2L12 |  |
| BCL2L15 |  |
| BCL3 |  |
| BCL6 |  |
| BCL7B |  |
| BCR |  |
| BCS1L |  |
| BDKRB2 |  |
| BDNF |  |
| BECN1 |  |
| BEST1 |  |
| BET1 |  |
| BGLAP |  |
| BGN |  |
| BHLHE41 |  |
| BIRC2 |  |
| BIRC3 |  |
| BIRC5 |  |
| BLK |  |
| BMP10 |  |
| BMP2 |  |
| BMP4 |  |
| BMP5 |  |
| BMP6 |  |
| BMS1 |  |
| BMS1P20 |  |
| BMX |  |
| BPI |  |
| BRAF |  |
| BRD1 |  |
| BRD2 |  |
| BRD3 |  |
| BRD4 |  |
| BRS3 |  |
| BSG |  |
| BTF3P11 |  |
| BTG3 |  |
| BTK |  |
| BTLA |  |
| BTN1A1 |  |
| BTNL2 |  |
| C18orf25 |  |
| C1QTNF3 |  |
| C1QTNF6 |  |
| C2 |  |
| C20orf181 |  |
| C2-AS1 |  |
| C2orf16 |  |
| C3 |  |
| C3AR1 |  |
| C3orf67 |  |
| C3orf67-AS1 | |
| C4A |  |
| C4B |  |
| C4B_2 |  |
| C5 |  |
| C5AR1 |  |
| C5-OT1 |  |
| C6orf47 |  |
| C9orf72 |  |
| CA1 |  |
| CA2 |  |
| CA3 |  |
| CABIN1 |  |
| CACNA1S |  |
| CALCRL |  |
| CALD1 |  |
| CALHM6 |  |
| CALM1 |  |
| CALM2 |  |
| CALM3 |  |
| CALR |  |
| CAMKMT |  |
| CAMP |  |
| CAPG |  |
| CAPRIN1 |  |
| CARD8 |  |
| CARD9 |  |
| CARMIL1 |  |
| CASC3 |  |
| CASP1 |  |
| CASP10 |  |
| CASP12 |  |
| CASP3 |  |
| CASP5 |  |
| CASP7 |  |
| CASP8 |  |
| CASP9 |  |
| CASR |  |
| CAST |  |
| CASTOR1 |  |
| CAT |  |
| CAV1 |  |
| CAV2 |  |
| CAVIN2 |  |
| CBLIF |  |
| CBLL2 |  |
| CCAL1 |  |
| CCAL2 |  |
| CCDC134 |  |
| CCDC88C |  |
| CCHCR1 |  |
| CCK |  |
| CCKBR |  |
| CCL1 |  |
| CCL11 |  |
| CCL13 |  |
| CCL14 |  |
| CCL17 |  |
| CCL18 |  |
| CCL19 |  |
| CCL2 |  |
| CCL20 |  |
| CCL21 |  |
| CCL22 |  |
| CCL23 |  |
| CCL24 |  |
| CCL25 |  |
| CCL26 |  |
| CCL27 |  |
| CCL28 |  |
| CCL3 |  |
| CCL3L1 |  |
| CCL4 |  |
| CCL4L1 |  |
| CCL4L2 |  |
| CCL5 |  |
| CCL7 |  |
| CCL8 |  |
| CCN1 |  |
| CCN2 |  |
| CCN4 |  |
| CCN5 |  |
| CCN6 |  |
| CCNB1 |  |
| CCND1 |  |
| CCNG2 |  |
| CCR1 |  |
| CCR10 |  |
| CCR2 |  |
| CCR3 |  |
| CCR4 |  |
| CCR5 |  |
| CCR6 |  |
| CCR7 |  |
| CCR9 |  |
| CCRL2 |  |
| CCT |  |
| CCT3 |  |
| CD109 |  |
| CD14 |  |
| CD160 |  |
| CD163 |  |
| CD19 |  |
| CD1C |  |
| CD1D |  |
| CD2 |  |
| CD209 |  |
| CD22 |  |
| CD226 |  |
| CD244 |  |
| CD247 |  |
| CD248 |  |
| CD27 |  |
| CD274 |  |
| CD276 |  |
| CD28 |  |
| CD2AP |  |
| CD34 |  |
| CD36 |  |
| CD38 |  |
| CD3E |  |
| CD4 |  |
| CD40 |  |
| CD40LG |  |
| CD44 |  |
| CD46 |  |
| CD47 |  |
| CD48 |  |
| CD5 |  |
| CD55 |  |
| CD58 |  |
| CD59 |  |
| CD6 |  |
| CD63 |  |
| CD68 |  |
| CD69 |  |
| CD70 |  |
| CD74 |  |
| CD79A |  |
| CD80 |  |
| CD82 |  |
| CD83 |  |
| CD84 |  |
| CD86 |  |
| CD8A |  |
| CD9 |  |
| CD93 |  |
| CDA |  |
| CDAN1 |  |
| CDAN2 |  |
| CDC42 |  |
| CDC42EP1 | |
| CDC42EP3 | |
| CDC73 |  |
| CDCA5 |  |
| CDCP1 |  |
| CDH11 |  |
| CDK1 |  |
| CDK2 |  |
| CDK2AP2 |  |
| CDK4 |  |
| CDK5R1 |  |
| CDK5RAP2 | |
| CDK6 |  |
| CDK7 |  |
| CDKAL1 |  |
| CDKN1A |  |
| CDKN1B |  |
| CDKN2A |  |
| CDKN2B-AS1 | |
| CDKN2C |  |
| CDKN2D |  |
| CDKN3 |  |
| CDR1-AS |  |
| CDR3 |  |
| CDSN |  |
| CEACAM8 |  |
| CEBPB |  |
| CEBPD |  |
| CECR |  |
| CELF2 |  |
| CEMIP |  |
| CENPE |  |
| CENPJ |  |
| CEP70 |  |
| CEP89 |  |
| CERNA3 |  |
| CFB |  |
| CFDP1 |  |
| CFH |  |
| CFLAR |  |
| CFTR |  |
| CGA |  |
| CGAS |  |
| CHAT |  |
| CHD7 |  |
| CHEK2 |  |
| CHGA |  |
| CHI3L1 |  |
| CHID1 |  |
| CHN2 |  |
| CHP1 |  |
| CHRM3 |  |
| CHRNA7 |  |
| CHST3 |  |
| CHST4 |  |
| CHUK |  |
| CIAO1 |  |
| CIAO3 |  |
| CIB1 |  |
| CIC |  |
| CIITA |  |
| CILP |  |
| CIP2A |  |
| CIRBP |  |
| CISH |  |
| CIZ1 |  |
| CLCNKB |  |
| CLDN1 |  |
| CLDN4 |  |
| CLDN6 |  |
| CLDN7 |  |
| CLEC10A |  |
| CLEC12A |  |
| CLEC16A |  |
| CLEC1B |  |
| CLEC4A |  |
| CLEC4E |  |
| CLEC5A |  |
| CLEC6A |  |
| CLEC7A |  |
| CLIC1 |  |
| CLN8 |  |
| CLNK |  |
| CLOCK |  |
| CLSTN2 |  |
| CLTA |  |
| CLU |  |
| CLYBL |  |
| CMKLR1 |  |
| CMTX5 |  |
| CNIH2 |  |
| CNN2 |  |
| CNNM3-DT | |
| CNR1 |  |
| CNR2 |  |
| CNTFR |  |
| CNTN2 |  |
| CNTN5 |  |
| CNTRL |  |
| COASY |  |
| COG2 |  |
| COG6 |  |
| COL11A2 |  |
| COL11A2P1 | |
| COL12A1 |  |
| COL18A1 |  |
| COL1A1 |  |
| COL1A2 |  |
| COL2A1 |  |
| COL4A1 |  |
| COL4A5 |  |
| COL9A2 |  |
| COLQ |  |
| COMMD1 |  |
| COMP |  |
| COPD |  |
| CORIN |  |
| COTL1 |  |
| COX1 |  |
| COX2 |  |
| COX5A |  |
| COX8A |  |
| CP |  |
| CPA1 |  |
| CPA4 |  |
| CPB1 |  |
| CPB2 |  |
| CPOX |  |
| CPP |  |
| CPQ |  |
| CR1 |  |
| CR2 |  |
| CRABP1 |  |
| CRABP2 |  |
| CREB1 |  |
| CREB3 |  |
| CREBBP |  |
| CREBRF |  |
| CREG1 |  |
| CRH |  |
| CRHR1 |  |
| CRHR2 |  |
| CRIP3 |  |
| CRISP2 |  |
| CRISP3 |  |
| CRK |  |
| CRKL |  |
| CRP |  |
| CRYGD |  |
| CSE1L |  |
| CSF1 |  |
| CSF1R |  |
| CSF2 |  |
| CSF2RA |  |
| CSF3 |  |
| CSF3R |  |
| CSK |  |
| CSMD3 |  |
| CSNK1E |  |
| CSNK2B |  |
| CSRP3 |  |
| CST3 |  |
| CST7 |  |
| CSTF3 |  |
| CT69 |  |
| CTH |  |
| CTHRC1 |  |
| CTIF |  |
| CTLA4 |  |
| CTNNB1 |  |
| CTRB1 |  |
| CTSB |  |
| CTSC |  |
| CTSD |  |
| CTSK |  |
| CTSL |  |
| CTSS |  |
| CUL1 |  |
| CUL5 |  |
| CUX1 |  |
| CUX2 |  |
| CX3CL1 |  |
| CX3CR1 |  |
| CXCL1 |  |
| CXCL10 |  |
| CXCL11 |  |
| CXCL12 |  |
| CXCL13 |  |
| CXCL16 |  |
| CXCL2 |  |
| CXCL3 |  |
| CXCL5 |  |
| CXCL6 |  |
| CXCL8 |  |
| CXCL9 |  |
| CXCR1 |  |
| CXCR2 |  |
| CXCR3 |  |
| CXCR4 |  |
| CXCR5 |  |
| CXCR6 |  |
| CYB5A |  |
| CYBA |  |
| CYBB |  |
| CYCS |  |
| CYCSP51 |  |
| CYCSP52 |  |
| CYLD |  |
| CYP17A1 |  |
| CYP19A1 |  |
| CYP1A1 |  |
| CYP1A2 |  |
| CYP21A2 |  |
| CYP26A1 |  |
| CYP26B1 |  |
| CYP2B6 |  |
| CYP2C19 |  |
| CYP2C8 |  |
| CYP2D6 |  |
| CYP2E1 |  |
| CYP2R1 |  |
| CYP3A4 |  |
| CYP3A5 |  |
| CYP4F23P |  |
| CYP4F3 |  |
| CYP4V2 |  |
| CYP7A1 |  |
| CYP7B1 |  |
| CYRIB |  |
| CYSLTR1 |  |
| DARS2 |  |
| DAXX |  |
| DBA2 |  |
| DBP |  |
| DBR1 |  |
| DCC |  |
| DCDC2C |  |
| DCK |  |
| DCLK3 |  |
| DCLRE1C |  |
| DCTN4 |  |
| DCTN6 |  |
| DDA1 |  |
| DDAH1 |  |
| DDAH2 |  |
| DDIT4 |  |
| DDR1 |  |
| DDR1-DT |  |
| DDR2 |  |
| DDX39A |  |
| DDX39B |  |
| DDX58 |  |
| DDX6 |  |
| DECR1 |  |
| DEDD |  |
| DEF6 |  |
| DEFA1 |  |
| DEFA3 |  |
| DEK |  |
| DENND1A | |
| DFNX1 |  |
| DGKQ |  |
| DHCR7 |  |
| DHFR |  |
| DHODH |  |
| DHX16 |  |
| DHX32 |  |
| DHX40 |  |
| DICER1 |  |
| DKK1 |  |
| DKK2 |  |
| DKK3 |  |
| DLACD |  |
| DLEU7 |  |
| DLG2 |  |
| DLL1 |  |
| DMD |  |
| DNAH8 |  |
| DNAJA2 |  |
| DNAJB1 |  |
| DNAJB1P1 | |
| DNAJB4 |  |
| DNAJB6 |  |
| DNAJC14 |  |
| DNASE1 |  |
| DNASE1L3 | |
| DNASE2 |  |
| DNER |  |
| DNM1L |  |
| DNMT1 |  |
| DNMT3B |  |
| DNTT |  |
| DOCK2 |  |
| DOT1L |  |
| DPEP1 |  |
| DPP4 |  |
| DR1 |  |
| DRAIC |  |
| DRD2 |  |
| DRD5 |  |
| DSPP |  |
| DST |  |
| DUSP1 |  |
| DUSP2 |  |
| DUSP22 |  |
| DUSP8 |  |
| DVL2 |  |
| DYRK1A |  |
| E2F2 |  |
| EBAG9 |  |
| EBF3 |  |
| EBI3 |  |
| EBNA1BP2 | |
| EBP |  |
| EDN1 |  |
| EDNRA |  |
| EDNRB |  |
| EFEMP1 |  |
| EFEMP2 |  |
| EFHC2 |  |
| EFNB1 |  |
| EFNB2 |  |
| EGF |  |
| EGFL8 |  |
| EGFR |  |
| EGLN1 |  |
| EGR1 |  |
| EGR2 |  |
| EHMT1 |  |
| EHMT2 |  |
| EHMT2-AS1 | |
| EIF2AK2 |  |
| EIF4E |  |
| EIF4EBP1 |  |
| EIF4G1 |  |
| ELANE |  |
| ELAVL1 |  |
| ELAVL2 |  |
| ELF3 |  |
| ELK3 |  |
| ELMO1 |  |
| ELN |  |
| EMCN |  |
| EMD |  |
| ENG |  |
| ENGASE |  |
| ENHO |  |
| ENO1 |  |
| ENOX1 |  |
| ENPP1 |  |
| ENPP2 |  |
| ENTPD1 |  |
| EOMES |  |
| EPAS1 |  |
| EPB41L5 |  |
| EPB42 |  |
| EPHA1 |  |
| EPHA3 |  |
| EPHB1 |  |
| EPHB2 |  |
| EPO |  |
| ERAP2 |  |
| ERBB2 |  |
| ERBB3 |  |
| ERCC2 |  |
| EREG |  |
| ERG |  |
| ERICH1 |  |
| ERV3-1 |  |
| ERVK-32 |  |
| ERVK-6 |  |
| ESR1 |  |
| ESR2 |  |
| ESRRB |  |
| ETFA |  |
| ETS1 |  |
| ETS2 |  |
| ETV7-AS1 |  |
| EXOC4 |  |
| EXOSC1 |  |
| EXT1 |  |
| EZH2 |  |
| F10 |  |
| F2 |  |
| F2R |  |
| F2RL1 |  |
| F3 |  |
| F5 |  |
| F9 |  |
| FABP5 |  |
| FADD |  |
| FADS1 |  |
| FADS2 |  |
| FAM107A |  |
| FAM167A |  |
| FAM215A |  |
| FAM53A |  |
| FAM53B |  |
| FAM86MP |  |
| FAP |  |
| FAS |  |
| FASLG |  |
| FAT1 |  |
| FBL |  |
| FBXO2 |  |
| FBXO22 |  |
| FBXW8 |  |
| FCER2 |  |
| FCGR1A |  |
| FCGR1B |  |
| FCGR2A |  |
| FCGR2B |  |
| FCGR2C |  |
| FCGR3A |  |
| FCGR3B |  |
| FCGRT |  |
| FCN1 |  |
| FCN2 |  |
| FCRL3 |  |
| FCRL4 |  |
| FCRLA |  |
| FER1L4 |  |
| FGB |  |
| FGD1 |  |
| FGF1 |  |
| FGF13 |  |
| FGF2 |  |
| FGF21 |  |
| FGF23 |  |
| FGF4 |  |
| FGF7 |  |
| FGF9 |  |
| FGFR1 |  |
| FGFR2 |  |
| FGFR3 |  |
| FHL1 |  |
| FHL2 |  |
| FHL5 |  |
| FIP1L1 |  |
| FKBP5 |  |
| FLACC1 |  |
| FLG |  |
| FLNA |  |
| FLNB |  |
| FLT1 |  |
| FLT3 |  |
| FLT3LG |  |
| FLT4 |  |
| FMR1 |  |
| FMR1-IT1 |  |
| FN1 |  |
| FNDC4 |  |
| FOLR1 |  |
| FOLR2 |  |
| FOS |  |
| FOSB |  |
| FOSL1 |  |
| FOXA2 |  |
| FOXC1 |  |
| FOXJ1 |  |
| FOXJ3 |  |
| FOXO1 |  |
| FOXO3 |  |
| FOXO4 |  |
| FOXP1 |  |
| FOXP3 |  |
| FPGS |  |
| FPLD2 |  |
| FPR1 |  |
| FPR2 |  |
| FRAXA |  |
| FRK |  |
| FRZB |  |
| FSCN1 |  |
| FST |  |
| FSTL1 |  |
| FSTL3 |  |
| FSTL4 |  |
| FTL |  |
| FTO |  |
| FURIN |  |
| FUT4 |  |
| FXYD2 |  |
| G0S2 |  |
| G3BP1 |  |
| G6PC |  |
| GAB2 |  |
| GABBR1 |  |
| GABBR2 |  |
| GABPA |  |
| GAD2 |  |
| GADD45A |  |
| GADD45B |  |
| GADD45GIP1 | |
| GALNT18 |  |
| GALNT3 |  |
| GAPDH |  |
| GAPLINC |  |
| GARS1 |  |
| GART |  |
| GAS5 |  |
| GAS6 |  |
| GAST |  |
| GATA1 |  |
| GATA2 |  |
| GATA3 |  |
| GATA3-AS1 | |
| GATA4 |  |
| GC |  |
| GCFC2 |  |
| GCG |  |
| GCH1 |  |
| GCHFR |  |
| GCK |  |
| GCKR |  |
| GCLC |  |
| GCM2 |  |
| GCY |  |
| GDAP1 |  |
| GDE1 |  |
| GDF11 |  |
| GDF15 |  |
| GDF2 |  |
| GDF5 |  |
| GDNF |  |
| GDPD5 |  |
| GEM |  |
| GFRA1 |  |
| GGCT |  |
| GGH |  |
| GGT1 |  |
| GGT2 |  |
| GGT6 |  |
| GGTLC1 |  |
| GGTLC3 |  |
| GGTLC4P |  |
| GGTLC5P |  |
| GH1 |  |
| GHRH |  |
| GHRL |  |
| GHSR |  |
| GIN1 |  |
| GIT2 |  |
| GJA1 |  |
| GLB1 |  |
| GLCCI1 |  |
| GLI1 |  |
| GLI2 |  |
| GLP1R |  |
| GLRA3 |  |
| GLS |  |
| GNA11 |  |
| GNA12 |  |
| GNAQ |  |
| GNB3 |  |
| GNL1 |  |
| GNS |  |
| GORASP1 |  |
| GP6 |  |
| GPANK1 |  |
| GPATCH8 |  |
| GPBAR1 |  |
| GPC1 |  |
| GPC5 |  |
| GPER1 |  |
| GPI |  |
| GPLD1 |  |
| GPN1 |  |
| GPR15 |  |
| GPR3 |  |
| GPR39 |  |
| GPR42 |  |
| GPR65 |  |
| GPRC5A |  |
| GPSM3 |  |
| GPT |  |
| GPX1 |  |
| GRAP2 |  |
| GRB2 |  |
| GREM1 |  |
| GRHL3 |  |
| GRIA1 |  |
| GRIK4 |  |
| GRK1 |  |
| GRK2 |  |
| GRK5 |  |
| GRK6 |  |
| GRN |  |
| GRP |  |
| GRPR |  |
| GSD1A |  |
| GSD7 |  |
| GSDMB |  |
| GSDME |  |
| GSK3B |  |
| GSN |  |
| GSTK1 |  |
| GSTM1 |  |
| GSTM2 |  |
| GSTP1 |  |
| GSTT1 |  |
| GTF2H1 |  |
| GTF2I |  |
| GTF2IRD1 |  |
| GTF3C2 |  |
| GTS |  |
| GUCY1B2 |  |
| GUSB |  |
| GYS1 |  |
| GZMA |  |
| GZMB |  |
| GZMM |  |
| H1-2 |  |
| H1-6 |  |
| H19 |  |
| H2AC1 |  |
| H2AC4 |  |
| H2AC5P |  |
| H2AC6 |  |
| H2BC1 |  |
| H2BC2P |  |
| H2BC4 |  |
| H2BP5 |  |
| H2BS1 |  |
| H3C2 |  |
| H3P13 |  |
| H3P19 |  |
| H3P23 |  |
| H3P28 |  |
| H3P40 |  |
| H3P43 |  |
| H3P44 |  |
| H3P8 |  |
| H4-16 |  |
| H4C1 |  |
| H4C11 |  |
| H4C12 |  |
| H4C13 |  |
| H4C14 |  |
| H4C15 |  |
| H4C2 |  |
| H4C3 |  |
| H4C4 |  |
| H4C5 |  |
| H4C6 |  |
| H4C8 |  |
| H4C9 |  |
| HAGH |  |
| HAM |  |
| HAMP |  |
| HAPLN1 |  |
| HARS1 |  |
| HARS2 |  |
| HAS1 |  |
| HAS3 |  |
| HAVCR1 |  |
| HAVCR2 |  |
| HCG17 |  |
| HCG18 |  |
| HCG22 |  |
| HCG27 |  |
| HCG9 |  |
| HCLS1 |  |
| HCP5 |  |
| HCRTR1 |  |
| HDAC1 |  |
| HDAC3 |  |
| HDAC4 |  |
| HDAC5 |  |
| HDAC6 |  |
| HDAC9 |  |
| HDC |  |
| HDGF |  |
| HECTD4 |  |
| HES1 |  |
| HESX1 |  |
| HEXA |  |
| HEXB |  |
| HFE |  |
| HGF |  |
| HHIP |  |
| HIF1A |  |
| HIP1 |  |
| HIPK2 |  |
| HIVEP3 |  |
| HK1 |  |
| HK2 |  |
| HLA-A |  |
| HLA-B |  |
| HLA-C |  |
| HLA-DMA | |
| HLA-DMB |  |
| HLA-DOA |  |
| HLA-DOB |  |
| HLA-DPA1 | |
| HLA-DPA2 | |
| HLA-DPB1 | |
| HLA-DPB2 | |
| HLA-DQA1 | |
| HLA-DQA2 | |
| HLA-DQB1 | |
| HLA-DQB2 | |
| HLA-DQB3 | |
| HLA-DRA |  |
| HLA-DRB1 | |
| HLA-DRB2 | |
| HLA-DRB3 | |
| HLA-DRB4 | |
| HLA-DRB5 | |
| HLA-DRB6 | |
| HLA-DRB9 | |
| HLA-E |  |
| HLA-G |  |
| HLA-P |  |
| HLA-S |  |
| HLF |  |
| HMGA2 |  |
| HMGB1 |  |
| HMGCR |  |
| HMMR |  |
| HMOX1 |  |
| HNF1A |  |
| HNF1A-AS1 | |
| HNF1B |  |
| HNF4G |  |
| HNFJ1 |  |
| HNFJ2 |  |
| HNFJ4 |  |
| HNRNPA1P2 | |
| HNRNPA2B1 | |
| HNRNPC |  |
| HNRNPDL |  |
| HOOK1 |  |
| HOOK2 |  |
| HOTAIR |  |
| HOXB2 |  |
| HOXC6 |  |
| HOXD10 |  |
| HOXD11 |  |
| HOXD13 |  |
| HOXD4 |  |
| HOXD9 |  |
| HP |  |
| HPGDS |  |
| HPLH1 |  |
| HPN |  |
| HPRT1 |  |
| HPSE |  |
| HRAS |  |
| HRG |  |
| HRH |  |
| HRH4 |  |
| HSD11B1 |  |
| HSD11B2 |  |
| HSD17B6 |  |
| HSD17B8 |  |
| HSP90AA1 | |
| HSP90B1 |  |
| HSP90B2P |  |
| HSPA14 |  |
| HSPA1A |  |
| HSPA1B |  |
| HSPA1L |  |
| HSPA4 |  |
| HSPA5 |  |
| HSPA8 |  |
| HSPB1 |  |
| HSPB2 |  |
| HSPB3 |  |
| HSPB8 |  |
| HSPBP1 |  |
| HSPD1 |  |
| HT |  |
| HTD2 |  |
| HTR1A |  |
| HTR2A |  |
| HTRA1 |  |
| HYAL2 |  |
| IAD |  |
| IAPP |  |
| IBD5 |  |
| IBTK |  |
| ICA1 |  |
| ICAM1 |  |
| ICAM3 |  |
| ICOS |  |
| ICOSLG |  |
| ID1 |  |
| IDDM13 |  |
| IDDM7 |  |
| IDDM8 |  |
| IDO1 |  |
| IDO2 |  |
| IER3 |  |
| IFI16 |  |
| IFI27 |  |
| IFI35 |  |
| IFI44 |  |
| IFI44L |  |
| IFIH1 |  |
| IFIT1 |  |
| IFIT2 |  |
| IFNA1 |  |
| IFNA13 |  |
| IFNB1 |  |
| IFNG |  |
| IFNGR1 |  |
| IFNGR2 |  |
| IFNL1 |  |
| IFNL2 |  |
| IFNLR1 |  |
| IFT172 |  |
| IGAN1 |  |
| IGF1 |  |
| IGF1R |  |
| IGF2 |  |
| IGFBP1 |  |
| IGFBP3 |  |
| IGFBP4 |  |
| IGFBP5 |  |
| IGFBP6 |  |
| IGFBP7 |  |
| IGH |  |
| IGHA1 |  |
| IGHG3 |  |
| IGHV1-69 |  |
| IGHV3-52 |  |
| IGHV3-69-1 | |
| IGHV3OR16-7 | |
| IGHV5-78 |  |
| IGKC |  |
| IGKV1D-8 |  |
| IGKV2-29 |  |
| IGKV3-20 |  |
| IGKV3D-15 | |
| IGLON5 |  |
| IKBKB |  |
| IKBKE |  |
| IKZF2 |  |
| IKZF3 |  |
| IL10 |  |
| IL10RA |  |
| IL10RB |  |
| IL11 |  |
| IL11RA |  |
| IL12A |  |
| IL12B |  |
| IL12RB1 |  |
| IL12RB2 |  |
| IL13 |  |
| IL15 |  |
| IL15RA |  |
| IL16 |  |
| IL17A |  |
| IL17B |  |
| IL17D |  |
| IL17F |  |
| IL17RA |  |
| IL17RC |  |
| IL17RD |  |
| IL18 |  |
| IL18BP |  |
| IL18R1 |  |
| IL18RAP |  |
| IL19 |  |
| IL1A |  |
| IL1B |  |
| IL1F10 |  |
| IL1R1 |  |
| IL1R2 |  |
| IL1RAP |  |
| IL1RAPL1 |  |
| IL1RN |  |
| IL2 |  |
| IL20 |  |
| IL20RA |  |
| IL20RB |  |
| IL21 |  |
| IL21R |  |
| IL22 |  |
| IL22RA1 |  |
| IL23A |  |
| IL23R |  |
| IL24 |  |
| IL25 |  |
| IL26 |  |
| IL27 |  |
| IL27RA |  |
| IL2RA |  |
| IL2RB |  |
| IL2RG |  |
| IL3 |  |
| IL32 |  |
| IL33 |  |
| IL34 |  |
| IL36B |  |
| IL37 |  |
| IL4 |  |
| IL4I1 |  |
| IL4R |  |
| IL5 |  |
| IL5RA |  |
| IL6 |  |
| IL6R |  |
| IL6ST |  |
| IL7 |  |
| IL7R |  |
| IL9 |  |
| IL9R |  |
| ILF3 |  |
| IMPACT |  |
| INHBA |  |
| INHBC |  |
| INHBE |  |
| INPP5D |  |
| INPP5K |  |
| INS |  |
| INSR |  |
| INSRR |  |
| INTS4 |  |
| IP6K3 |  |
| IRAK1 |  |
| IRAK2 |  |
| IRAK3 |  |
| IRAK4 |  |
| IRF1 |  |
| IRF3 |  |
| IRF4 |  |
| IRF5 |  |
| IRF8 |  |
| IRS1 |  |
| IRX1 |  |
| IRX5 |  |
| ISG15 |  |
| ISG20 |  |
| ISL1 |  |
| ISYNA1 |  |
| ITCH |  |
| ITGA1 |  |
| ITGA2 |  |
| ITGA2B |  |
| ITGA4 |  |
| ITGA5 |  |
| ITGA6 |  |
| ITGA9 |  |
| ITGAE |  |
| ITGAL |  |
| ITGAM |  |
| ITGAV |  |
| ITGAX |  |
| ITGB1 |  |
| ITGB2 |  |
| ITIH1 |  |
| ITIH4 |  |
| ITPR2 |  |
| ITPR3 |  |
| ITSN1 |  |
| IVNS1ABP |  |
| JAG1 |  |
| JAK1 |  |
| JAK2 |  |
| JAK3 |  |
| JAM2 |  |
| JAM3 |  |
| JAZF1 |  |
| JTB |  |
| JUN |  |
| JUNB |  |
| JUND |  |
| KANK4 |  |
| KAT2A |  |
| KAT5 |  |
| KAT7 |  |
| KCNA4 |  |
| KCNIP3 |  |
| KCNJ1 |  |
| KCNMA1 |  |
| KCNQ1 |  |
| KDM6A |  |
| KDM6B |  |
| KDR |  |
| KEAP1 |  |
| KHDRBS1 |  |
| KHSRP |  |
| KIAA1109 |  |
| KIDINS220 | |
| KIF26B |  |
| KIF5A |  |
| KIFBP |  |
| KIR2DL1 |  |
| KIR2DL2 |  |
| KIR2DL3 |  |
| KIR2DL5A |  |
| KIR2DL5B |  |
| KIR2DS1 |  |
| KIR2DS2 |  |
| KIR2DS3 |  |
| KIR2DS4 |  |
| KIR2DS5 |  |
| KIR3DL1 |  |
| KIR3DL2 |  |
| KIR3DS1 |  |
| KIT |  |
| KITLG |  |
| KL |  |
| KLF12 |  |
| KLF2 |  |
| KLF4 |  |
| KLF6 |  |
| KLK1 |  |
| KLK3 |  |
| KLRB1 |  |
| KLRC1 |  |
| KLRC2 |  |
| KLRC4-KLRK1 | |
| KLRD1 |  |
| KLRK1 |  |
| KMT2A |  |
| KNG1 |  |
| KPNA1 |  |
| KPNA2 |  |
| KRIT1 |  |
| KRT13 |  |
| KRT16 |  |
| KRT20 |  |
| KRT5 |  |
| KRT7 |  |
| KRT8 |  |
| KRT8P26 |  |
| KRTAP5-9 |  |
| KRTCAP3 |  |
| KYNU |  |
| LAG3 |  |
| LAIR1 |  |
| LAIR2 |  |
| LAMA3 |  |
| LAMP3 |  |
| LAMTOR2 |  |
| LANCL1 |  |
| LARS1 |  |
| LARS2 |  |
| LAT |  |
| LATS2 |  |
| LBH |  |
| LBP |  |
| LBR |  |
| LCAT |  |
| LCE3B |  |
| LCE3C |  |
| LCK |  |
| LCN2 |  |
| LDHD |  |
| LDLR |  |
| LECT2 |  |
| LEP |  |
| LERFS |  |
| LGALS1 |  |
| LGALS2 |  |
| LGALS3 |  |
| LGALS3BP |  |
| LGALS8 |  |
| LGALS9 |  |
| LHFPL3 |  |
| LHX2 |  |
| LIF |  |
| LIFR |  |
| LIG4 |  |
| LILRA1 |  |
| LILRA2 |  |
| LILRA3 |  |
| LILRB1 |  |
| LILRB2 |  |
| LILRB3 |  |
| LINC00243 | |
| LINC00273 | |
| LINC00294 | |
| LINC00452 | |
| LINC00824 | |
| LINC01010 | |
| LINC01104 | |
| LINC01185 | |
| LINC01193 | |
| LINC01229 | |
| LINC01405 | |
| LINC01460 | |
| LINC01672 | |
| LINC01748 | |
| LINC01934 | |
| LINC02196 | |
| LINC02210-CRHR1 | |
| LINC02356 | |
| LINC02357 | |
| LINC02537 | |
| LINC02571 | |
| LINC02605 | |
| LINC02649 | |
| LINC02656 | |
| LINC-ROR | |
| LMLN |  |
| LMNA |  |
| LNCPRESS1 | |
| LNPEP |  |
| LNS |  |
| LOC100505909 | |
| LOC100506023 | |
| LOC102723407 | |
| LOC102724197 | |
| LOC102724334 | |
| LOC102724971 | |
| LOC102725035 | |
| LOC105379528 | |
| LOC106007493 | |
| LOC107987462 | |
| LOC390714 | |
| LOH19CR1 | |
| LONP1 |  |
| LOX |  |
| LOXL2 |  |
| LPA |  |
| LPAR1 |  |
| LPAR2 |  |
| LPAR3 |  |
| LPIN2 |  |
| LRAT |  |
| LRG1 |  |
| LRIG1 |  |
| LRIT1 |  |
| LRP1 |  |
| LRP2 |  |
| LRP5 |  |
| LRP6 |  |
| LRPAP1 |  |
| LRPPRC |  |
| LRRC18 |  |
| LRRC31 |  |
| LSP1 |  |
| LST1 |  |
| LTA |  |
| LTB |  |
| LTB4R |  |
| LTB4R2 |  |
| LTBR |  |
| LVRN |  |
| LY6G5B |  |
| LY6G5C |  |
| LY6G6C |  |
| LY6G6D |  |
| LY6G6F |  |
| LY96 |  |
| LYVE1 |  |
| LYZ |  |
| MAA |  |
| MAB21L2 |  |
| MACIR |  |
| MACROD1 | |
| MAF |  |
| MAGEE1 |  |
| MAGI3 |  |
| MAL |  |
| MALAT1 |  |
| MALT1 |  |
| MANF |  |
| MAP1LC3A | |
| MAP1LC3B | |
| MAP2K1 |  |
| MAP2K4 |  |
| MAP2K7 |  |
| MAP3K11 |  |
| MAP3K2 |  |
| MAP3K3 |  |
| MAP3K4 |  |
| MAP3K5 |  |
| MAP3K7 |  |
| MAP4K2 |  |
| MAP4K3 |  |
| MAPK1 |  |
| MAPK10 |  |
| MAPK13 |  |
| MAPK14 |  |
| MAPK3 |  |
| MAPK6 |  |
| MAPK8 |  |
| MAPK9 |  |
| MAPT |  |
| MARCHF1 |  |
| MARCKS |  |
| MARCO |  |
| MARF1 |  |
| MARK1 |  |
| MARK2 |  |
| MASP1 |  |
| MASP2 |  |
| MAST3 |  |
| MBD2 |  |
| MBD4 |  |
| MBL2 |  |
| MBL3P |  |
| MBNL1 |  |
| MBP |  |
| MCAM |  |
| MCCD1 |  |
| MCKD1 |  |
| MCL1 |  |
| MDC1 |  |
| MDC1-AS1 | |
| MDGA2 |  |
| MDK |  |
| MDM2 |  |
| MDM4 |  |
| MECOM |  |
| MECP2 |  |
| MEFV |  |
| MEG3 |  |
| MEN1 |  |
| MEPE |  |
| MERTK |  |
| MET |  |
| METTL3 |  |
| MFAP1 |  |
| MFAP4 |  |
| MFSD4B |  |
| MGARP |  |
| MGAT5 |  |
| MIA |  |
| MIA3 |  |
| MIB1 |  |
| MICA |  |
| MICB |  |
| MIF |  |
| MIF-AS1 |  |
| MINDY4 |  |
| MIP |  |
| MIR106A |  |
| MIR10A |  |
| MIR1246 |  |
| MIR125A |  |
| MIR126 |  |
| MIR132 |  |
| MIR135B |  |
| MIR137 |  |
| MIR140 |  |
| MIR141 |  |
| MIR142 |  |
| MIR143 |  |
| MIR145 |  |
| MIR146A |  |
| MIR147A |  |
| MIR148B |  |
| MIR150 |  |
| MIR152 |  |
| MIR155 |  |
| MIR155HG | |
| MIR16-1 |  |
| MIR17 |  |
| MIR17HG |  |
| MIR181D |  |
| MIR182 |  |
| MIR183 |  |
| MIR188 |  |
| MIR18A |  |
| MIR1908 |  |
| MIR192 |  |
| MIR193A |  |
| MIR196A2 | |
| MIR199A1 | |
| MIR199A2 | |
| MIR19A |  |
| MIR19B1 |  |
| MIR200C |  |
| MIR203A |  |
| MIR204 |  |
| MIR20A |  |
| MIR21 |  |
| MIR210 |  |
| MIR212 |  |
| MIR214 |  |
| MIR219A2 | |
| MIR22 |  |
| MIR221 |  |
| MIR222 |  |
| MIR223 |  |
| MIR23A |  |
| MIR23B |  |
| MIR26B |  |
| MIR27A |  |
| MIR27B |  |
| MIR29A |  |
| MIR29B1 |  |
| MIR29B2 |  |
| MIR301A |  |
| MIR302B |  |
| MIR30A |  |
| MIR31 |  |
| MIR320A |  |
| MIR323A |  |
| MIR338 |  |
| MIR33A |  |
| MIR346 |  |
| MIR34A |  |
| MIR34B |  |
| MIR34C |  |
| MIR363 |  |
| MIR372 |  |
| MIR382 |  |
| MIR410 |  |
| MIR421 |  |
| MIR432 |  |
| MIR448 |  |
| MIR451A |  |
| MIR4701 |  |
| MIR4764 |  |
| MIR486-1 |  |
| MIR488 |  |
| MIR498 |  |
| MIR499A |  |
| MIR506 |  |
| MIR5100 |  |
| MIR522 |  |
| MIR539 |  |
| MIR551B |  |
| MIR5571 |  |
| MIR573 |  |
| MIR590 |  |
| MIR6089 |  |
| MIR613 |  |
| MIR633 |  |
| MIR642A |  |
| MIR650 |  |
| MIR663A |  |
| MIR671 |  |
| MIR6716 |  |
| MIR6785 |  |
| MIR708 |  |
| MIR7-1 |  |
| MIR7-2 |  |
| MIR7-3 |  |
| MIR760 |  |
| MIR762 |  |
| MIR766 |  |
| MIR769 |  |
| MIR887 |  |
| MIR920 |  |
| MIR98 |  |
| MIR99B |  |
| MIRLET7B |  |
| MITF |  |
| MKI67 |  |
| MLXIP |  |
| MLXIPL |  |
| MME |  |
| MMEL1 |  |
| MMP1 |  |
| MMP10 |  |
| MMP12 |  |
| MMP13 |  |
| MMP14 |  |
| MMP15 |  |
| MMP16 |  |
| MMP17 |  |
| MMP19 |  |
| MMP2 |  |
| MMP20 |  |
| MMP25 |  |
| MMP3 |  |
| MMP7 |  |
| MMP8 |  |
| MMP9 |  |
| MMRN1 |  |
| MNAT1 |  |
| MOBP |  |
| MOG |  |
| MOK |  |
| MON2 |  |
| MOS |  |
| MPG |  |
| MPIG6B |  |
| MPO |  |
| MPP1 |  |
| MPV17 |  |
| MRC1 |  |
| MRE11 |  |
| MRPL17 |  |
| MRPL33 |  |
| MS |  |
| MS4A1 |  |
| MSC |  |
| MSD |  |
| MSH2 |  |
| MSH3 |  |
| MSH5 |  |
| MSH5-SAPCD1 | |
| MSH6 |  |
| MSI1 |  |
| MSL |  |
| MSMB |  |
| MSRA |  |
| MST1 |  |
| MSTN |  |
| MT1B |  |
| MTA1 |  |
| MTCO2P12 | |
| MTCO3P1 |  |
| MTDH |  |
| MTF1 |  |
| MTHFR |  |
| MTMR3 |  |
| MTNR1B |  |
| MTOR |  |
| MTR |  |
| MTRR |  |
| MTTP |  |
| MTX1 |  |
| MUC1 |  |
| MUC17 |  |
| MUC2 |  |
| MUC22 |  |
| MUC3A |  |
| MUC3B |  |
| MUC4 |  |
| MUC5AC |  |
| MUC5B |  |
| MUCL3 |  |
| MUL1 |  |
| MUTYH |  |
| MX1 |  |
| MYBBP1A |  |
| MYC |  |
| MYCN |  |
| MYD88 |  |
| MYDGF |  |
| MYL8P |  |
| MYO18B |  |
| MYO9B |  |
| N4BP1 |  |
| NAA25 |  |
| NADSYN1 |  |
| NAF1 |  |
| NALCN |  |
| NAMPT |  |
| NAT10 |  |
| NAT2 |  |
| NAT8 |  |
| NAV2 |  |
| NBN |  |
| NCAM1 |  |
| NCF1 |  |
| NCF2 |  |
| NCF4 |  |
| NCKIPSD |  |
| NCOA1 |  |
| NCOA3 |  |
| NCOA5 |  |
| NCOR1 |  |
| NCR3 |  |
| ND1 |  |
| NDST1 |  |
| NDUFA13 |  |
| NDUFA4L2 | |
| NDUFA7 |  |
| NDUFS3 |  |
| NEAT1 |  |
| NEBL |  |
| NECAB2 |  |
| NEDD9 |  |
| NELFCD |  |
| NELFE |  |
| NELL1 |  |
| NEU1 |  |
| NEU3 |  |
| NFAT5 |  |
| NFATC1 |  |
| NFATC2 |  |
| NFE2L2 |  |
| NFIA |  |
| NFIL3 |  |
| NFKB1 |  |
| NFKBIA |  |
| NFKBIB |  |
| NFKBIE |  |
| NFKBIL1 |  |
| NFYA |  |
| NGF |  |
| NHS |  |
| NIPAL1 |  |
| NKAP |  |
| NKAPL |  |
| NKX2-1 |  |
| NLRC3 |  |
| NLRC5 |  |
| NLRP1 |  |
| NLRP2 |  |
| NLRP3 |  |
| NLRP6 |  |
| NLRX1 |  |
| NM |  |
| NME1 |  |
| NMNAT3 |  |
| NMT1 |  |
| NNAT |  |
| NOD1 |  |
| NOD2 |  |
| NONO |  |
| NONOP2 |  |
| NOS1 |  |
| NOS2 |  |
| NOS3 |  |
| NOTCH1 |  |
| NOTCH2 |  |
| NOTCH3 |  |
| NOTCH4 |  |
| NOX4 |  |
| NPAS2 |  |
| NPC2 |  |
| NPHPL1 |  |
| NPPA |  |
| NPPB |  |
| NPSR1 |  |
| NQO1 |  |
| NR1I2 |  |
| NR1I3 |  |
| NR1I4 |  |
| NR2C2 |  |
| NR2F1 |  |
| NR3C1 |  |
| NR4A1 |  |
| NR4A2 |  |
| NR4A3 |  |
| NRBP1 |  |
| NRG4 |  |
| NRM |  |
| NRP1 |  |
| NRSN1 |  |
| NRXN2 |  |
| NRXN2-AS1 | |
| NT5C2 |  |
| NT5E |  |
| NTN1 |  |
| NTRK1 |  |
| NTT |  |
| NUCB2 |  |
| NUDT11 |  |
| NUDT17 |  |
| NUMB |  |
| NUP35 |  |
| NUP62 |  |
| NUP88 |  |
| NUP98 |  |
| NXF1 |  |
| NXPH4 |  |
| OAP |  |
| OAZ1 |  |
| OCLN |  |
| ODC1 |  |
| ODF1 |  |
| OGG1 |  |
| OLIG3 |  |
| OLR1 |  |
| OPLL |  |
| OPN1LW |  |
| OPRK1 |  |
| OR12D3 |  |
| OR2AG1 |  |
| OR2H2 |  |
| OR5V1 |  |
| OR7E35P |  |
| ORAI1 |  |
| ORC4 |  |
| ORMDL3 |  |
| OS9 |  |
| OSCAR |  |
| OSCP1 |  |
| OSM |  |
| OSMR |  |
| OVOL1 |  |
| OXA1L |  |
| P2RX1 |  |
| P2RX2 |  |
| P2RX3 |  |
| P2RX4 |  |
| P2RX5 |  |
| P2RX5-TAX1BP3 | |
| P2RX6 |  |
| P2RX7 |  |
| P2RY1 |  |
| P2RY11 |  |
| P2RY12 |  |
| P2RY2 |  |
| P4HB |  |
| PADI2 |  |
| PADI3 |  |
| PADI4 |  |
| PADI6 |  |
| PAEP |  |
| PAG1 |  |
| PAK1 |  |
| PAK3 |  |
| PAM |  |
| PANK2 |  |
| PAPOLA |  |
| PARD6A |  |
| PARP1 |  |
| PARP2 |  |
| PARP9 |  |
| PART1 |  |
| PAX5 |  |
| PBOV1 |  |
| PBX2 |  |
| PCBP1 |  |
| PCBP4 |  |
| PCDH15 |  |
| PCLAF |  |
| PCNA |  |
| PCNP |  |
| PCSK1 |  |
| PCSK6 |  |
| PCSK9 |  |
| PCYT1A |  |
| PDC |  |
| PDCD1 |  |
| PDCD1LG2 | |
| PDCD5 |  |
| PDE10A |  |
| PDE1C |  |
| PDE2A |  |
| PDE3A |  |
| PDE4A |  |
| PDE4D |  |
| PDE7A |  |
| PDGFD |  |
| PDGFRA |  |
| PDGFRB |  |
| PDIA3 |  |
| PDK1 |  |
| PDLIM3 |  |
| PDLIM7 |  |
| PDPK1 |  |
| PDPN |  |
| PDS5A |  |
| PDZK1 |  |
| PEBP1 |  |
| PECAM1 |  |
| PELP1 |  |
| PER2 |  |
| PER3 |  |
| PF4 |  |
| PFKFB3 |  |
| PFKM |  |
| PGBD1 |  |
| PGF |  |
| PGK1 |  |
| PGLYRP1 |  |
| PGM1 |  |
| PGR |  |
| PHACTR3 |  |
| PHEX |  |
| PHF19 |  |
| PHLDB1 |  |
| PHRF1 |  |
| PHTF1 |  |
| PI3 |  |
| PICSAR |  |
| PIEZO1 |  |
| PIGR |  |
| PIK3CA |  |
| PIK3CB |  |
| PIK3CD |  |
| PIK3CG |  |
| PIK3R1 |  |
| PIK3R2 |  |
| PIK3R3 |  |
| PIM1 |  |
| PIM2 |  |
| PIN1 |  |
| PIR |  |
| PITX2 |  |
| PIWIL1 |  |
| PIWIL2 |  |
| PIWIL4 |  |
| PKD1 |  |
| PKD2 |  |
| PKD2L1 |  |
| PKD6 |  |
| PKN1 |  |
| PLA2G10 |  |
| PLA2G1B |  |
| PLA2G2A |  |
| PLA2G4A |  |
| PLAAT4 |  |
| PLAT |  |
| PLAU |  |
| PLAUR |  |
| PLB1 |  |
| PLCG2 |  |
| PLCL1 |  |
| PLCL2 |  |
| PLD1 |  |
| PLD3 |  |
| PLD4 |  |
| PLEK |  |
| PLEKHM2 |  |
| PLEKHO1 |  |
| PLF |  |
| PLG |  |
| PLK1 |  |
| PLK3 |  |
| PLTP |  |
| PML |  |
| PNP |  |
| PNPLA2 |  |
| POLD1 |  |
| POLDIP2 |  |
| POLG2 |  |
| POLR3C |  |
| POMC |  |
| PON1 |  |
| PON2 |  |
| POSTN |  |
| POT1 |  |
| POTEF |  |
| POTEKP |  |
| POTEM |  |
| POU1F1 |  |
| POU2AF1 |  |
| POU2F1 |  |
| POU2F2 |  |
| POU3F1 |  |
| POU5F1 |  |
| PPAN |  |
| PPAN-P2RY11 | |
| PPARA |  |
| PPARD |  |
| PPARG |  |
| PPARGC1B | |
| PPBP |  |
| PPCDC |  |
| PPIA |  |
| PPIAP9 |  |
| PPIG |  |
| PPIL4 |  |
| PPM1A |  |
| PPM1D |  |
| PPM1G |  |
| PPM1K-DT | |
| PPP1R10 |  |
| PPP1R11 |  |
| PPP1R15A |  |
| PPP1R1A |  |
| PPP1R2C |  |
| PPT2 |  |
| PPT2-EGFL8 | |
| PRAM1 |  |
| PRAP1 |  |
| PRCP |  |
| PRDM1 |  |
| PRDM10 |  |
| PRDM16 |  |
| PRDM8 |  |
| PRDX2 |  |
| PRDX5 |  |
| PRDX6 |  |
| PRELP |  |
| PRF1 |  |
| PRG4 |  |
| PRKAG2 |  |
| PRKCA |  |
| PRKCB |  |
| PRKCH |  |
| PRKCQ |  |
| PRKCZ |  |
| PRKG2 |  |
| PRKN |  |
| PRL |  |
| PRMT1 |  |
| PRMT5 |  |
| PROC |  |
| PROM1 |  |
| PROP1 |  |
| PRORP |  |
| PRPS1 |  |
| PRR12 |  |
| PRRC2A |  |
| PRRT1 |  |
| PRRT2 |  |
| PRSS2 |  |
| PRSS55 |  |
| PRTFDC1 |  |
| PRTN3 |  |
| PSC |  |
| PSEN1 |  |
| PSG5 |  |
| PSIP1 |  |
| PSMA4 |  |
| PSMB5 |  |
| PSMB6 |  |
| PSMB8 |  |
| PSMB8-AS1 | |
| PSMB9 |  |
| PSMD12 |  |
| PSMD7 |  |
| PSMD9 |  |
| PSMG1 |  |
| PSORS1C1 | |
| PSS |  |
| PSTPIP1 |  |
| PTBP1 |  |
| PTCH1 |  |
| PTEN |  |
| PTGER2 |  |
| PTGER4 |  |
| PTGES |  |
| PTGS1 |  |
| PTGS2 |  |
| PTH |  |
| PTHLH |  |
| PTK2 |  |
| PTK2B |  |
| PTMA |  |
| PTMAP4 |  |
| PTN |  |
| PTPN11 |  |
| PTPN14 |  |
| PTPN2 |  |
| PTPN22 |  |
| PTPRC |  |
| PTPRD |  |
| PTPRJ |  |
| PTPRK |  |
| PTPRU |  |
| PTPRVP |  |
| PTX3 |  |
| PUF60 |  |
| PWAR1 |  |
| PXK |  |
| PYCARD |  |
| PYDC1 |  |
| PYGM |  |
| QPCT |  |
| QPCTL |  |
| QRICH2 |  |
| R3HDM2 |  |
| RAB14 |  |
| RAB27B |  |
| RAB40B |  |
| RAB8A |  |
| RABEP1 |  |
| RABEPK |  |
| RABGEF1 |  |
| RAC1 |  |
| RAC2 |  |
| RAD51B |  |
| RAF1 |  |
| RAF1P1 |  |
| RAG1 |  |
| RAG2 |  |
| RAMP2 |  |
| RAP1A |  |
| RAP2A |  |
| RAPH1 |  |
| RARA |  |
| RARB |  |
| RARG |  |
| RARRES2 |  |
| RASD1 |  |
| RASGRP1 |  |
| RASGRP2 |  |
| RASL12 |  |
| RAVER1 |  |
| RB1 |  |
| RBFOX1 |  |
| RBM45 |  |
| RBP2 |  |
| RBP4 |  |
| RBPJ |  |
| RBPJP4 |  |
| RCAD |  |
| RCAN1 |  |
| RCAN3 |  |
| RCHY1 |  |
| RCOR1 |  |
| RDX |  |
| RECK |  |
| REG1A |  |
| REL |  |
| RELA |  |
| RELA-DT |  |
| REM1 |  |
| REN |  |
| RET |  |
| RETN |  |
| REV3L |  |
| REXO1 |  |
| RFC1 |  |
| RFX3-AS1 |  |
| RGCC |  |
| RGMB |  |
| RGS1 |  |
| RGS12 |  |
| RHBDF2 |  |
| RHCE |  |
| RHO |  |
| RHUC2 |  |
| RIMS2 |  |
| RIPK1 |  |
| RIPOR2 |  |
| RIT2 |  |
| RMC1 |  |
| RMDN1 |  |
| RMDN2 |  |
| RMDN3 |  |
| RMRP |  |
| RNASE1 |  |
| RNASE2 |  |
| RNASE3 |  |
| RNASEH2A | |
| RNASEH2B | |
| RNASEH2C | |
| RNASET2 |  |
| RNF115 |  |
| RNF19A |  |
| RNF2 |  |
| RNF5 |  |
| RNU1-1 |  |
| RO60 |  |
| ROBO1 |  |
| ROBO3 |  |
| ROPN1L |  |
| RORA |  |
| RORC |  |
| ROS1 |  |
| RPL17 |  |
| RPL17-C18orf32 | |
| RPL37A |  |
| RPL3P2 |  |
| RPP14 |  |
| RPP21 |  |
| RPS12P4 |  |
| RPS18 |  |
| RPS19 |  |
| RPS4X |  |
| RPS6KA3 |  |
| RPS6KA4 |  |
| RPS6KA5 |  |
| RPS6KB1 |  |
| RPS6KB2 |  |
| RPSA |  |
| RRAS |  |
| RREB1 |  |
| RRM2 |  |
| RSBN1 |  |
| RSPO2 |  |
| RTKN2 |  |
| RTL1 |  |
| RUNX1 |  |
| RUNX2 |  |
| RXRA |  |
| RYR1 |  |
| S100A1 |  |
| S100A10 |  |
| S100A11 |  |
| S100A12 |  |
| S100A4 |  |
| S100A8 |  |
| S100A9 |  |
| S100B |  |
| S1PR1 |  |
| S1PR2 |  |
| S1PR3 |  |
| SAA1 |  |
| SAA2 |  |
| SAA3P |  |
| SAA4 |  |
| SAAL1 |  |
| SACM1L |  |
| SAMD9 |  |
| SAMHD1 |  |
| SAPCD1 |  |
| SAR1A |  |
| SARDH |  |
| SAT1 |  |
| SATB2 |  |
| SCD |  |
| SCD5 |  |
| SCG2 |  |
| SCGN |  |
| SCLY |  |
| SCO2 |  |
| SDC1 |  |
| SDC2 |  |
| SDC3 |  |
| SDC4 |  |
| SDF2L1 |  |
| SEC14L2 |  |
| SEC61A1 |  |
| SELE |  |
| SELENOS |  |
| SELL |  |
| SELP |  |
| SEMA3A |  |
| SEMA3C |  |
| SEMA4A |  |
| SEMA4D |  |
| SEMA6A |  |
| SEMA6B |  |
| SEMA7A |  |
| SENP1 |  |
| SERPINA1 |  |
| SERPINA3 |  |
| SERPINB2 |  |
| SERPINC1 |  |
| SERPINE1 |  |
| SERPINF1 |  |
| SERPINF2 |  |
| SERPINH1 |  |
| SESN2 |  |
| SETD2 |  |
| SETMAR |  |
| SF3B6 |  |
| SFMBT1 |  |
| SFRP1 |  |
| SFRP2 |  |
| SFRP4 |  |
| SFRP5 |  |
| SFTA2 |  |
| SFTPA2 |  |
| SFTPD |  |
| SGCA |  |
| SGCG |  |
| SGCZ |  |
| SGSM3 |  |
| SH2B3 |  |
| SH2D1A |  |
| SH3BP2 |  |
| SH3BP4 |  |
| SH3PXD2A | |
| SHBG |  |
| SHCBP1 |  |
| SHH |  |
| SHLD2 |  |
| SIAE |  |
| SIGIRR |  |
| SIGLEC1 |  |
| SIGLEC7 |  |
| SIGLEC9 |  |
| SIK1 |  |
| SIK1B |  |
| SIRPA |  |
| SIRT1 |  |
| SIRT6 |  |
| SKIV2L |  |
| SLAMF1 |  |
| SLC11A1 |  |
| SLC12A1 |  |
| SLC12A3 |  |
| SLC12A9 |  |
| SLC13A3 |  |
| SLC14A2 |  |
| SLC16A3 |  |
| SLC16A4 |  |
| SLC16A9 |  |
| SLC17A1 |  |
| SLC17A2 |  |
| SLC17A3 |  |
| SLC17A4 |  |
| SLC17A5 |  |
| SLC17A6 |  |
| SLC19A1 |  |
| SLC20A1 |  |
| SLC22A1 |  |
| SLC22A11 |  |
| SLC22A12 |  |
| SLC22A18AS | |
| SLC22A2 |  |
| SLC22A4 |  |
| SLC22A5 |  |
| SLC22A6 |  |
| SLC22A7 |  |
| SLC22A9 |  |
| SLC25A12 |  |
| SLC28A2 |  |
| SLC2A1 |  |
| SLC2A3 |  |
| SLC2A6 |  |
| SLC2A9 |  |
| SLC37A4 |  |
| SLC38A1 |  |
| SLC3A2 |  |
| SLC40A1 |  |
| SLC44A4 |  |
| SLC46A1 |  |
| SLC4A1 |  |
| SLC4A1AP | |
| SLC52A1 |  |
| SLC52A2 |  |
| SLC5A2 |  |
| SLC5A5 |  |
| SLC5A6 |  |
| SLC5A7 |  |
| SLC6A11 |  |
| SLC6A2 |  |
| SLC7A4 |  |
| SLC7A5 |  |
| SLC7A9 |  |
| SLC8A3 |  |
| SLCO1C1 |  |
| SLCO6A1 |  |
| SLIT3 |  |
| SLPI |  |
| SLURP1 |  |
| SMAD1 |  |
| SMAD3 |  |
| SMAD7 |  |
| SMG1 |  |
| SMG7 |  |
| SMIM40 |  |
| SMO |  |
| SMOX |  |
| SMPD1 |  |
| SMR3A |  |
| SMS |  |
| SMTNL2 |  |
| SMUG1 |  |
| SNAI1 |  |
| SNAI2 |  |
| SNAPIN |  |
| SNCA |  |
| SNHG32 |  |
| SNORA38 |  |
| SNW1 |  |
| SNX17 |  |
| SOAT1 |  |
| SOCS1 |  |
| SOCS2 |  |
| SOCS3 |  |
| SOD1 |  |
| SOD2 |  |
| SOD3 |  |
| SOST |  |
| SOX4 |  |
| SOX5 |  |
| SP1 |  |
| SPA17 |  |
| SPAG11A |  |
| SPAG11B |  |
| SPAG16 |  |
| SPARC |  |
| SPATA2 |  |
| SPESP1 |  |
| SPHK1 |  |
| SPHK2 |  |
| SPHKAP |  |
| SPN |  |
| SPP1 |  |
| SPR |  |
| SPRED2 |  |
| SPRY1 |  |
| SPRY2 |  |
| SPSB1 |  |
| SPTA1 |  |
| SPTB |  |
| SPZ1 |  |
| SQSTM1 |  |
| SRC |  |
| SRF |  |
| SRGAP1 |  |
| SRL |  |
| SRP54 |  |
| SRSF11 |  |
| SRY |  |
| SSB |  |
| SSRP1 |  |
| SST |  |
| SSTR4 |  |
| ST2 |  |
| ST6GAL1 |  |
| ST6GALNAC5 | |
| STAG1 |  |
| STAT1 |  |
| STAT3 |  |
| STAT4 |  |
| STAT5A |  |
| STAT5B |  |
| STAT6 |  |
| STATH |  |
| STC2 |  |
| STEAP4 |  |
| STIM1 |  |
| STING1 |  |
| STK19 |  |
| STRA6 |  |
| STS |  |
| STXBP6 |  |
| SUB1 |  |
| SULT2A1 |  |
| SUMO1 |  |
| SUMO2 |  |
| SUMO3 |  |
| SUMO4 |  |
| SUOX |  |
| SUPT20H |  |
| SYBU |  |
| SYNGAP1 |  |
| SYNGR1 |  |
| SYNM |  |
| SYT1 |  |
| SYVN1 |  |
| TAB2 |  |
| TAC1 |  |
| TAC4 |  |
| TACR1 |  |
| TACR2 |  |
| TACR3 |  |
| TADA1 |  |
| TAGAP |  |
| TAGLN |  |
| TAL1 |  |
| TAM |  |
| TAP1 |  |
| TAP2 |  |
| TAPBP |  |
| TARP |  |
| TAT |  |
| TAX1BP3 |  |
| TBC1D9 |  |
| TBCA |  |
| TBL2 |  |
| TBPL1 |  |
| TBX1 |  |
| TBX21 |  |
| TBX3 |  |
| TBX5 |  |
| TCEA1 |  |
| TCF19 |  |
| TCF3 |  |
| TCF7L2 |  |
| TCN2 |  |
| TCP11L1 |  |
| TDGF1 |  |
| TDGF1P3 |  |
| TEC |  |
| TEF |  |
| TEK |  |
| TEP1 |  |
| TERF2 |  |
| TERF2IP |  |
| TERT |  |
| TESPA1 |  |
| TET1 |  |
| TF |  |
| TFDP1 |  |
| TFEB |  |
| TFF1 |  |
| TFF2 |  |
| TFF3 |  |
| TFPI2 |  |
| TG |  |
| TGFA |  |
| TGFB1 |  |
| TGFB2 |  |
| TGFB3 |  |
| TGFBI |  |
| TGFBR1 |  |
| TGIF1 |  |
| TGM2 |  |
| TH |  |
| THAS |  |
| THBD |  |
| THBS1 |  |
| THEMIS |  |
| THNSL2 |  |
| THOP1 |  |
| THRIL |  |
| THY1 |  |
| TIA1 |  |
| TICAM2 |  |
| TIE1 |  |
| TIGIT |  |
| TIMD4 |  |
| TIMELESS |  |
| TIMP1 |  |
| TIMP2 |  |
| TIMP3 |  |
| TINAGL1 |  |
| TIRAP |  |
| TKTL1 |  |
| TLE3 |  |
| TLR1 |  |
| TLR10 |  |
| TLR2 |  |
| TLR3 |  |
| TLR4 |  |
| TLR5 |  |
| TLR7 |  |
| TLR8 |  |
| TLR9 |  |
| TM7SF2 |  |
| TMED2 |  |
| TMED7 |  |
| TMED7-TICAM2 | |
| TMEM147 |  |
| TMEM158 |  |
| TMEM179 |  |
| TMEM187 |  |
| TMEM235 |  |
| TMEM60 |  |
| TMPO |  |
| TMPOP1 |  |
| TMPRSS13 | |
| TMPRSS2 |  |
| TMPRSS5 |  |
| TNC |  |
| TNF |  |
| TNFAIP2 |  |
| TNFAIP3 |  |
| TNFAIP8L2 | |
| TNFRSF10A | |
| TNFRSF10B | |
| TNFRSF11A | |
| TNFRSF11B | |
| TNFRSF12A | |
| TNFRSF13C | |
| TNFRSF14 |  |
| TNFRSF17 |  |
| TNFRSF18 |  |
| TNFRSF1A | |
| TNFRSF1B |  |
| TNFRSF25 |  |
| TNFRSF4 |  |
| TNFRSF6B |  |
| TNFRSF8 |  |
| TNFRSF9 |  |
| TNFSF10 |  |
| TNFSF11 |  |
| TNFSF12 |  |
| TNFSF12-TNFSF13 | |
| TNFSF13 |  |
| TNFSF13B |  |
| TNFSF14 |  |
| TNFSF15 |  |
| TNFSF4 |  |
| TNFSF9 |  |
| TNIP1 |  |
| TNIP3 |  |
| TNNC1 |  |
| TNNI3 |  |
| TNPO3 |  |
| TNXB |  |
| TP53 |  |
| TP63 |  |
| TP73 |  |
| TPD52 |  |
| TPH2 |  |
| TPI1 |  |
| TPMT |  |
| TPO |  |
| TPP1 |  |
| TPPP |  |
| TPSAB1 |  |
| TPST1 |  |
| TPT1 |  |
| TRA |  |
| TRAC |  |
| TRAF1 |  |
| TRAF3 |  |
| TRAF3IP2 |  |
| TRAF5 |  |
| TRAF6 |  |
| TRAJ60 |  |
| TRAP |  |
| TRAV29DV5 | |
| TRAV5 |  |
| TRAV6 |  |
| TRB |  |
| TRBC1 |  |
| TRBC2 |  |
| TRBV14 |  |
| TRBV16 |  |
| TRBV2 |  |
| TRBV20-1 |  |
| TRBV20OR9-2 | |
| TRBV27 |  |
| TRBV28 |  |
| TRBV3-1 |  |
| TRBV6-7 |  |
| TRBV7-9 |  |
| TRD |  |
| TREH |  |
| TREM1 |  |
| TREM2 |  |
| TREX1 |  |
| TRG |  |
| TRGC1 |  |
| TRIM10 |  |
| TRIM15 |  |
| TRIM21 |  |
| TRIM26 |  |
| TRIM26BP |  |
| TRIM3 |  |
| TRIM31 |  |
| TRIM38 |  |
| TRIM39 |  |
| TRIM39-RPP21 | |
| TRIM40 |  |
| TRIM46 |  |
| TRIM54 |  |
| TRPC1 |  |
| TRPC5 |  |
| TRPM2 |  |
| TRPM3 |  |
| TRPS1 |  |
| TRPV1 |  |
| TRPV2 |  |
| TRPV4 |  |
| TSBP1 |  |
| TSBP1-AS1 | |
| TSC22D3 |  |
| TSL |  |
| TSLP |  |
| TSPAN5 |  |
| TSPO |  |
| TTC38 |  |
| TTN |  |
| TTR |  |
| TXN |  |
| TXNDC5 |  |
| TXNIP |  |
| TXNRD1 |  |
| TYK2 |  |
| TYMP |  |
| TYMS |  |
| TYRO3 |  |
| TYROBP |  |
| TYRP1 |  |
| UAQTL1 |  |
| UAQTL4 |  |
| UAQTL5 |  |
| UAQTL6 |  |
| UBASH3A |  |
| UBASH3B |  |
| UBDP1 |  |
| UBE2L3 |  |
| UBE2N |  |
| UBE2Q2 |  |
| UBL5 |  |
| UBTF |  |
| UCA1 |  |
| UCN |  |
| UCN2 |  |
| UCN3 |  |
| UCP2 |  |
| UGCG |  |
| UGT1A1 |  |
| UGT1A10 |  |
| UGT1A4 |  |
| UGT1A6 |  |
| UGT1A7 |  |
| UGT1A8 |  |
| UHRF1 |  |
| UHRF1BP1 | |
| UMOD |  |
| UNC5B |  |
| UNC5C |  |
| UNG |  |
| UOX |  |
| UPK3B |  |
| UQCC2 |  |
| UQCRFS1 |  |
| URI1 |  |
| USO1 |  |
| USP18 |  |
| UTRN |  |
| UTS2R |  |
| VARS1 |  |
| VARS2 |  |
| VAV1 |  |
| VCAM1 |  |
| VDAC1 |  |
| VDR |  |
| VEGFA |  |
| VEGFC |  |
| VEGFD |  |
| VIL1 |  |
| VIM |  |
| VIP |  |
| VIPR1 |  |
| VPREB1 |  |
| VPS37C |  |
| VPS51 |  |
| VPS52 |  |
| VSIG4 |  |
| VSTM1 |  |
| VTCN1 |  |
| VTN |  |
| VWA7 |  |
| VWF |  |
| WAKMAR2 | |
| WARS1 |  |
| WARS2 |  |
| WDFY4 |  |
| WDHD1 |  |
| WDR1 |  |
| WDR11 |  |
| WDR26 |  |
| WDR27 |  |
| WG |  |
| WIF1 |  |
| WNK1 |  |
| WNT1 |  |
| WNT10B |  |
| WNT16 |  |
| WNT3 |  |
| WNT5A |  |
| WNT5B |  |
| WRN |  |
| XAN1 |  |
| XBP1 |  |
| XBP1P1 |  |
| XCL1 |  |
| XDH |  |
| XIAP |  |
| XPNPEP3 |  |
| XPR1 |  |
| XRCC1 |  |
| XRCC4 |  |
| YAP1 |  |
| YME1L1 |  |
| YWHAZ |  |
| YY1 |  |
| ZAP70 |  |
| ZBTB16 |  |
| ZBTB38 |  |
| ZBTB7A |  |
| ZC3H12A |  |
| ZC3HC1 |  |
| ZCCHC2 |  |
| ZDHHC2 |  |
| ZDHHC20P2 | |
| ZFAS1 |  |
| ZFP36 |  |
| ZFP42 |  |
| ZFYVE9 |  |
| ZGLP1 |  |
| ZKSCAN4 |  |
| ZMYM3 |  |
| ZMYM6 |  |
| ZNF175 |  |
| ZNF292 |  |
| ZNF302 |  |
| ZNF334 |  |
| ZNF391 |  |
| ZNF423 |  |
| ZNF469 |  |
| ZNF512 |  |
| ZNF513 |  |
| ZNF518B |  |
| ZNF595 |  |
| ZNF644 |  |
| ZNF679 |  |
| ZNRD1ASP | |
| ZNRD2 |  |
| ZPBP2 |  |
| ZSCAN26 |  |
| ZSCAN31 |  |
